# Supplementary material for: Differentially Expressed Extracellular Vesicle-Contained microRNAs before and after Transurethral Resection of Bladder Tumors
Source: MDPI journal article supplement (doi:10.3390/cimb43010024), 2021-06-04
Supplement: s1 [file s1]

## Supplementary

|               | Sex | Age | Smoking status | Initial Diagnosis                             | Urine EVs particle concentration     | Serum EVs particle concentration     | urine Evs | Serum Evs |
|---------------|-----|-----|----------------|-----------------------------------------------|--------------------------------------|--------------------------------------|-----------|-----------|
| <b>NCP 1</b>  | M   | 72  | CURRENT        | Adenometous hyperplasia                       | 2.95e+007 +/- 2.56e+006 particles/ml | 7.20e+008 +/- 6.47e+007 particles/ml | 79.5      | 80.8      |
| <b>NCP 2</b>  | M   | 70  | PREVIOUS       | Badder diverticulum with chronic inflammation | 1.48e+008 +/- 1.41e+007 particles/ml | 2.26e+008 +/- 2.85e+007 particles/ml | 87.1      | 82        |
| <b>NCP 3</b>  | F   | 44  | NEVER          | Normal cystoscopy                             | 4.97e+007 +/- 1.17e+006 particles/ml | 2.57e+008 +/- 5.66e+005 particles/ml | 86.4      | 76.9      |
| <b>NCP 4</b>  | M   | 67  | NEVER          | Chronic inflammation                          | 1.35e+008 +/- 1.22e+006 particles/ml | 1.53e+008 +/- 4.12e+007 particles/ml | 63.7      | 69.7      |
| <b>NCP 5</b>  | F   | 52  | NEVER          | Inverted urothelial papilloma                 | No result                            | 1.80e+008 +/- 1.22e+007 particles/ml | -         | 68        |
| <b>NCP 6</b>  | F   | 52  | CURRENT        | Chronic inflammation                          | 1.33e+008 +/- 5.74e+006 particles/ml | 1.59e+008 +/- 4.26e+007 particles/ml | 97        | -         |
| <b>NCP 7</b>  | F   | 73  | NEVER          | Glanudlar cystic cystitis                     | 4.60e+008 +/- 9.82e+007 particles/ml | 2.14e+008 +/- 1.05e+007 particles/ml | 96.8      | 78.3      |
| <b>NCP 8</b>  | F   | 70  | NEVER          | Chronic inflammation                          | 2.34e+008 +/- 4.14e+007 particles/ml | 2.49e+008 +/- 8.89e+006 particles/ml | 89.1      | -         |
| <b>NCP 9</b>  | M   | 82  | PREVIOUS       | Papilloma with local inflammation             | 1.61e+008 +/- 6.49e+005 particles/ml | 1.95e+008 +/- 5.19e+007 particles/ml | 108.8     | 64.8      |
| <b>NCP 10</b> | F   | 79  | PREVIOUS       | Reactive squamous epithial metaplasia         | 5.57e+008 +/- 2.06e+007 particles/ml | 1.89e+008 +/- 3.19e+005 particles/ml | 101.8     | 93.3      |
| <b>NCP 11</b> | F   | 59  | PREVIOUS       | Papilloma                                     | 2.82e+008 +/- 9.83e+006 particles/ml | 3.65e+008 +/- 3.07e+006 particles/ml | 110       | 77.2      |
| <b>NCP 12</b> | F   | 42  | PREVIOUS       | Chronic inflammation                          | 1.13e+008 +/- 5.23e+007 particles/ml | 2.95e+008 +/- 5.34e+006 particles/ml | 134.5     | 126       |
| <b>NCP 13</b> | M   | 46  | CURRENT        | Maloplakia                                    | 7.86e+008 +/- 1.33e+008 particles/ml | 4.81e+008 +/- 1.73e+007 particles/ml | 108.6     | 91.7      |
| <b>NCP 14</b> | M   | 72  | PREVIOUS       | Glandular cystic cystitis                     | 6.25e+008 +/- 7.87e+007 particles/ml | 3.24e+008 +/- 2.31e+007 particles/ml | 89.3      | 76.7      |
| <b>NCP 15</b> | M   | 72  | PREVIOUS       | Chronic inflammation                          | 2.07e+008 +/- 2.12e+007 particles/ml | 2.62e+008 +/- 5.53e+007 particles/ml | 69.9      | 126.6     |

**Table S1. Characterization of NCPs and EV particle concentrations for urine and serum samples included in the study.** Sex, age and smoking status for each NCP as well as their primary diagnosis upon inclusion into the study are outlined. Individual urine EV and serum EV particle concentration (particles/ml) and mode size (nm) by NTA are shown. Some size values are absent due to sample limitation.

|                   | Sample Number | BCG Treatment         |
|-------------------|---------------|-----------------------|
| <b>Patient 15</b> | Sample 1      | None                  |
|                   | Sample 2      | Induction treatment   |
|                   | Sample 3      | None                  |
|                   | Sample 4      | Maintenance treatment |
| <b>Patient 19</b> | Sample 1      | None                  |
|                   | Sample 2      | Induction treatment   |
|                   | Sample 3      | Maintenance treatment |
| <b>Patient 22</b> | Sample 1      | None                  |
|                   | Sample 2      | Induction treatment   |
|                   | Sample 3      | Maintenance treatment |
| <b>Patient 24</b> | Sample 1      | None                  |
|                   | Sample 2      | Induction treatment   |
| <b>Patient 25</b> | Sample 1      | None                  |
|                   | Sample 2      | Induction treatment   |
| <b>Patient 26</b> | Sample 1      | None                  |
|                   | Sample 2      | Induction treatment   |
| <b>Patient</b>    | Sample 1      | None                  |
|                   | Sample 2      | Induction treatment   |
| <b>Patient</b>    | Sample 1      | None                  |
|                   | Sample 2      | Induction treatment   |

**Table S2. BCG treatment of BC patients.** Table of patients who received BCG treatment during the study. When type of BCG treatment is noted next to sample number, this indicates treatment in the timeframe prior to the sample collection. Breakdown of specific patients and their detailed samples who underwent BCG treatment.

|           | Sample Number | Procedure  | Clinical status | Clinical timepoint | Urine EVs particle concentration | Serum EVs particle concentration | Urine Evs particle size | Serum Evs particle size |
|-----------|---------------|------------|-----------------|--------------------|----------------------------------|----------------------------------|-------------------------|-------------------------|
| Patient 1 | Sample 1      | TURB       | TaG1            | 0                  | 2.34e+008 +/- 1.09e+007          | 9.17e+008 +/- 1.28e+006          | 123.4                   | 84.4                    |
|           | Sample 2      | Cystoscopy | Recurrence-free | 6                  | 8.67e+008 +/- 4.04e+007          | 3.63e+008 +/- 1.16e+007          | 96.3                    | 65.8                    |
|           | Sample 3      | Cystoscopy | Recurrence-free | 12                 | 1.35e+008 +/- 7.81e+006          | 2.95e+008 +/- 3.92e+007          | 110.3                   | 69.5                    |
| Patient 2 | Sample 1      | TURB       | TaG1            | 0                  | 3.64e+007 +/- 5.49e+006          | 2.25e+008 +/- 3.95e+007          | 117.2                   | 78.7                    |
|           | Sample 2      | Cystoscopy | Recurrence-free | 8                  | 4.13e+008 +/- 2.21e+007          | 6.45e+007 +/- 1.39e+007          | 101                     | 93.3                    |
|           | Sample 3      | Cystoscopy | Recurrence-free | 21                 | 6.99e+007 +/- 2.90e+006          | 1.52e+008 +/- 3.30e+007          | 111                     | 96.7                    |
| Patient 3 | Sample 1      | TURB       | TaG1            | 0                  | 1.53e+008 +/- 1.50e+007          | 1.81e+008 +/- 5.04e+006          | 86.2                    | 86.6                    |
|           | Sample 2      | Cystoscopy | Recurrence-free | 3                  | 7.15e+007 +/- 3.23e+006          | 6.24e+007 +/- 1.38e+007          | 93.9                    | 131.9                   |
|           | Sample 3      | Cystoscopy | Recurrence-free | 12                 | 1.14e+008 +/- 6.01e+006          | 8.85e+007 +/- 6.21e+006          | 98.6                    | 27.4                    |
| Patient 4 | Sample 1      | TURB       | TaG1            | 0                  | 1.60e+008 +/- 1.86e+007          | 3.04e+007 +/- 4.80e+006          | 70.5                    | 57                      |
|           | Sample 2      | Cystoscopy | Recurrence-free | 3                  | 5.41e+008 +/- 1.57e+007          | 4.68e+007 +/- 3.32e+006          | 87                      | 72.6                    |
|           | Sample 3      | Cystoscopy | Recurrence-free | 12                 | 7.04e+008 +/- 4.92e+007          | 1.62e+008 +/- 3.90e+006          | 86.6                    | 95.6                    |
| Patient 5 | Sample 1      | TURB       | TaG1            | 0                  | 5.13e+008 +/- 2.83e+006          | 2.24e+008 +/- 1.30e+007          | 90.7                    | 75.5                    |
|           | Sample 2      | Cystoscopy | Recurrence-free | 3                  | 2.42e+008 +/- 1.15e+008          | 3.59e+007 +/- 9.95e+006          | 75.4                    | 70.3                    |
|           | Sample 3      | Cystoscopy | Recurrence-free | 12                 | 3.12e+008 +/- 7.61e+006          | 1.37e+008 +/- 3.55e+006          | 106                     | 82.8                    |
| Patient 6 | Sample 1      | TURB       | TaG1            | 0                  | 6.60e+007 +/- 3.06e+006          | 3.79e+008 +/- 1.65e+008          | 88.3                    | 67                      |
|           | Sample 2      | Cystoscopy | Recurrence-free | 3                  | 6.13e+007 +/- 1.49e+007          | 4.24e+008 +/- 2.73e+007          | 84.1                    | 64.1                    |
|           | Sample 3      | Cystoscopy | Recurrence-free | 12                 | 1.29e+008 +/- 3.52e+007          | 5.93e+008 +/- 9.59e+007          | 93.5                    | 70.3                    |
| Patient 7 | Sample 1      | TURB       | TaG2            | 0                  | 2.47e+008 +/- 4.65e+007          | 4.53e+008 +/- 5.08e+007          | 83.4                    | 87.6                    |
|           | Sample 2      | Cystoscopy | Recurrence-free | 6                  | 3.28e+008 +/- 2.40e+007          | 1.10e+009 +/- 1.35e+008          | 82.8                    | 82.4                    |
|           | Sample 3      | Cystoscopy | Recurrence-free | 12                 | 1.10e+008 +/- 4.79e+006          | 8.09e+008 +/- 2.44e+008          | 81.8                    | 83.6                    |
| Patient 8 | Sample 1      | TURB       | TaG2            | 0                  | 2.17e+007 +/- 4.41e+006          | 9.24e+008 +/- 3.86e+007          | 134.6                   | 69.3                    |
|           | Sample 2      | Cystoscopy | Recurrence-free | 3                  | 4.17e+007 +/- 8.65e+006          | 9.98e+008 +/- 5.85e+007          | 113.8                   | 72.8                    |
|           | Sample 3      | Cystoscopy | Recurrence-free | 12                 | 3.09e+007 +/- 1.65e+006          | 7.65e+008 +/- 4.90e+007          | 68.3                    | 82.1                    |
| Patient 9 | Sample 1      | TURB       | TaG2            | 0                  | 9.07e+007 +/- 6.98e+005          | 7.48e+008 +/- 2.00e+007          | 96.7                    | 68.6                    |

|            |          |                               |                  |    |                         |                         |       |      |
|------------|----------|-------------------------------|------------------|----|-------------------------|-------------------------|-------|------|
|            | Sample 2 | Cystoscopy                    | Recurrence-free  | 3  | 3.62e+007 +/- 5.86e+006 | 5.52e+008 +/- 7.27e+007 | 68.6  | 71.4 |
|            | Sample 3 | Cystoscopy                    | Recurrence-free  | 12 | 1.27e+008 +/- 6.14e+006 | 4.49e+008 +/- 8.48e+007 | 90.7  | 71.4 |
| Patient 10 | Sample 1 | TURB                          | TaG2             | 0  | 4.85e+007 +/- 4.17e+006 | 7.01e+008 +/- 5.82e+007 | 28,6  | 66.7 |
|            | Sample 2 | Cystoscopy                    | Recurrence-free  | 3  | 6.89e+007 +/- 4.79e+006 | 8.70e+008 +/- 5.76e+007 | 25,4  | 63.1 |
|            | Sample 3 | Cystoscopy                    | Recurrence-free  | 6  | 3.80e+008 +/- 1.71e+007 | 2.44e+008 +/- 1.70e+007 | 105.8 | 70.4 |
| Patient 11 | Sample 1 | TURB                          | TaG2             | 0  | 9.06e+007 +/- 1.56e+006 | 2.97e+008 +/- 1.50e+007 | 103.4 | 60.4 |
|            | Sample 2 | Cystoscopy                    | Recurrence-free  | 7  | 2.12e+008 +/- 8.53e+005 | 5.45e+008 +/- 2.45e+007 | 97.4  | 64.3 |
|            | Sample 3 | Cystoscopy                    | Recurrence-free  | 11 | 7.31e+008 +/- 4.59e+007 | 3.27e+008 +/- 7.77e+007 | 105   | 78.4 |
| Patient 12 | Sample 1 | TURB                          | TaG1             | 0  | 5.94e+007 +/- 7.00e+005 | 4.48e+008 +/- 4.14e+006 | 102.9 | 66.4 |
|            | Sample 2 | Cystoscopy                    | Reccurrence-free | 7  | 2.73e+008 +/- 3.38e+007 | 3.90e+008 +/- 1.19e+008 | 95.2  | 67.5 |
|            | Sample 3 | Cystoscopy                    | Recurrence-free  | 10 | 1.70e+008 +/- 7.05e+006 | 5.21e+008 +/- 2.71e+007 | 78.3  | 72.3 |
| Patient 13 | Sample 1 | TURB                          | TaG1             | 0  | 4.46e+008 +/- 5.44e+007 | 3.59e+008 +/- 4.55e+007 | 129.6 | 53.9 |
|            | Sample 2 | Cystoscopy                    | Recurrence-free  | 3  | 4.11e+008 +/- 3.90e+007 | 1.64e+008 +/- 5.37e+007 | 91.2  | 79.5 |
| Patient 14 | Sample 1 | TURB                          | TaG1             | 0  | 9.70e+007 +/- 9.86e+006 | 6.48e+008 +/- 4.24e+007 | 142   | 60.9 |
|            | Sample 2 | Cystoscopy                    | Recurrence-free  | 3  | 6.22e+007 +/- 3.87e+006 | 6.48e+008 +/- 4.24e+007 | 77.4  | -    |
|            | Sample 3 | Cystoscopy                    | Recurrence-free  | 7  | 1.60e+008 +/- 1.19e+007 | 3.73e+008 +/- 5.42e+007 | 88.7  | 86.2 |
| Patient 15 | Sample 1 | TURB                          | TaG2             | 0  | 2.02e+008 +/- 1.71e+007 | 2.58e+008 +/- 8.58e+006 | 94.8  | 69.2 |
|            | Sample 2 | Cystoscopy                    | Recurrence-free  | 6  | 3.56e+008 +/- 1.17e+006 | 2.21e+008 +/- 7.26e+006 | 117.2 | 67   |
|            | Sample 3 | Cystoscopy                    | Recurrence-free  | 17 | 3.21e+009 +/- 7.99e+006 | 3.47e+008 +/- 1.00e+007 | 122.3 | 67.2 |
| Patient 16 | Sample 1 | TURB                          | T1G3             | 0  | 1.69e+008 +/- 3.35e+007 | 3.11e+008 +/- 1.21e+007 | 112.1 | 65.6 |
|            | Sample 2 | Cystoscopy                    | Recurrence-free  | 6  | 2.87e+007 +/- 2.22e+006 | 3.69e+008 +/- 3.93e+007 | 123.3 | 66   |
| Patient 17 | Sample 1 | TURB                          | T1G3             | 0  | 2.82e+008 +/- 8.16e+007 | 6.84e+008 +/- 8.52e+006 | 86.1  | 62.7 |
|            | Sample 2 | Clinical check-up + urography | Recurrence-free  | 5  | 1.57e+009 +/- 7.59e+006 | 8.92e+008 +/- 7.66e+007 | 106.3 | 68.6 |
| Patient 18 | Sample 1 | TURB                          | T1G2             | 0  | 1.44e+008 +/- 3.19e+006 | 7.26e+008 +/- 2.82e+007 | 138.8 | 63.7 |
|            | Sample 2 | Cystoscopy                    | Recurrence-free  | 5  | 7.44e+008 +/- 2.36e+00  | 5.01e+008 +/- 1.99e+008 | -     | 69   |
| Patient 19 | Sample 1 | TURB                          | T1G3             | 0  | 3.51e+008 +/- 4.89e+007 | 7.08e+008 +/- 2.60e+007 | 104.1 | 73.5 |
|            | Sample 2 | Cystoscopy                    | Recurrence-free  | 5  | 9.64e+007 +/- 9.13e+006 | 8.62e+008 +/- 1.24e+007 | 66.8  | 72.2 |
|            | Sample 3 | Cystoscopy                    | Recurrence-free  | 13 | 4.18e+007 +/- 7.01e+006 | 4.49e+008 +/- 4.18e+007 | 85.5  | 61.7 |

|            |          |                                |                 |    |                         |                         |       |       |
|------------|----------|--------------------------------|-----------------|----|-------------------------|-------------------------|-------|-------|
| Patient 20 | Sample 1 | TURB                           | T1G3            | 0  | 6.51e+008 +/- 1.72e+008 | 4.18e+008 +/- 3.22e+007 | 83.7  | 60    |
|            | Sample 2 | Cystoscopy                     | Recurrence-free | 5  | 2.36e+008 +/- 4.73e+007 | 1.01e+008 +/- 3.66e+007 | 105   | 77.4  |
|            | Sample 3 | Cystoscopy                     | Recurrence-free | 12 | 7.02e+007 +/- 1.82e+006 | 2.05e+008 +/- 1.97e+007 | 85.6  | 69.4  |
| Patient 21 | Sample 1 | TURB                           | T1G3/CIS        | 0  | 8.16e+007 +/- 1.87e+007 | 6.54e+008 +/- 5.33e+007 | 64.5  | 64.3  |
|            | Sample 2 | CT (chest, abdominal & pelvic) | Recurrence-free | 6  | 6.20e+008 +/- 5.83e+00  | 1.31e+008 +/- 1.09e+007 | -     | 91.1  |
| Patient 22 | Sample 1 | TURB                           | T1G3            | 0  | 4.94e+007 +/- 5.72e+006 | 2.14e+008 +/- 2.13e+006 | 123.7 | 85.5  |
|            | Sample 2 | Cystoscopy                     | Recurrence-free | 4  | 7.91e+007 +/- 1.33e+007 | 4.81e+007 +/- 5.58e+006 | 101.1 | -     |
|            | Sample 3 | Cystoscopy                     | Recurrence-free | 16 | 1.07e+008 +/- 2.71e+006 | 9.91e+007 +/- 9.68e+006 | 72    | 114.1 |
| Patient 23 | Sample 1 | TURB                           | T1G3            | 0  | 2.58e+008 +/- 2.64e+006 | 4.81e+008 +/- 1.73e+007 | 101.9 | 76.9  |
|            | Sample 2 | Cystoscopy                     | Recurrence-free | 3  | 5.09e+008 +/- 1.08e+008 | 8.66e+007 +/- 4.49e+006 | 83.6  | 91.7  |
| Patient 24 | Sample 1 | TURB                           | T1G2            | 0  | 3.46e+008 +/- 6.39e+007 | 1.89e+008 +/- 3.19e+005 | 99.9  | 75.9  |
|            | Sample 2 | Cystoscopy                     | Recurrence-free | 3  | 3.36e+008 +/- 1.10e+007 | 2.10e+008 +/- 2.41e+007 | 93.3  | 75.3  |
| Patient 25 | Sample 1 | TURB                           | TaG2            | 0  | 2.14e+008 +/- 2.73e+007 | 1.30e+008 +/- 1.70e+007 | 119.1 | 77.2  |
|            | Sample 2 | Cystoscopy                     | Recurrence-free | 3  | 2.37e+008 +/- 9.05e+006 | 1.11e+008 +/- 1.46e+007 | 111.8 | -     |
| Patient 26 | Sample 1 | TURB                           | TaG3            | 0  | 6.39e+007 +/- 1.59e+007 | 2.49e+008 +/- 8.89e+006 | 95.4  | 89.2  |
|            | Sample 2 | Cystoscopy                     | Recurrence-free | 5  | 8.37e+008 +/- 2.10e+006 | 1.92e+008 +/- 9.22e+005 | 94.2  | 89.4  |
| Patient 27 | Sample 1 | TURB                           | T1G2            | 0  | 3.31e+008 +/- 1.06e+007 | 2.95e+008 +/- 5.34e+006 | 101.7 | 71.6  |
|            | Sample 2 | Cystoscopy                     | Recurrence-free | 4  | 1.88e+008 +/- 3.40e+007 | 2.12e+008 +/- 1.99e+007 | 80.4  | 87    |
| Patient 28 | Sample 1 | TURB                           | TaG2            | 0  | 1.13e+008 +/- 5.23e+007 | 1.59e+008 +/- 4.26e+007 | 95    | 97.2  |
|            | Sample 2 | Cystoscopy                     | Recurrence-free | 9  | 5.65e+008 +/- 1.31e+006 | 1.54e+008 +/- 1.49e+007 | 115   | 68    |
|            | Sample 3 | Cystoscopy                     | Recurrence-free | 12 | 1.01e+008 +/- 1.15e+007 | 1.11e+008 +/- 1.46e+007 | 105.4 | 77.9  |
| Patient 29 | Sample 1 | TURB                           | TaG1            | 0  | -                       | -                       | -     | -     |
|            | Sample 2 | Cystoscopy                     | Recurrence-free | 3  | -                       | -                       | -     | -     |
| Patient 30 | Sample 1 | TURB                           | TaG2            | 0  | -                       | -                       | -     | -     |
|            | Sample 2 | Cystoscopy                     | Recurrence-free | 3  | -                       | -                       | -     | -     |
| Patient 31 | Sample 1 | TURB                           | TaG1            | 0  | -                       | -                       | -     | -     |
|            | Sample 2 | Cystoscopy                     | Recurrence-free | 3  | -                       | -                       | -     | -     |
| Patient 32 | Sample 1 | TURB                           | TaG2            | 0  | -                       | -                       | -     | -     |
|            | Sample 2 | Cystoscopy                     | Recurrence-free | 3  | -                       | -                       | -     | -     |
| Patient 33 | Sample 1 | TURB                           | TaG2            | 0  | -                       | -                       | -     | -     |
|            | Sample 2 | Cystoscopy                     | Recurrence-free | 3  | -                       | -                       | -     | -     |
|            | Sample 1 | TURB                           | TaG2            | 0  | -                       | -                       | -     | -     |

|            |          |                               |                 |   |   |   |   |   |
|------------|----------|-------------------------------|-----------------|---|---|---|---|---|
| Patient 34 | Sample 2 | Cystoscopy                    | Recurrence-free | 3 | - | - | - | - |
| Patient 35 | Sample 1 | TURB                          | TaG2            | 0 | - | - | - | - |
|            | Sample 2 | Cystoscopy                    | Recurrence-free | 3 | - | - | - | - |
| Patient 36 | Sample 1 | TURB                          | TaG1            | 0 | - | - | - | - |
|            | Sample 2 | Cystoscopy                    | Recurrence-free | 3 | - | - | - | - |
| Patient 37 | Sample 1 | TURB                          | TaG2            | 0 | - | - | - | - |
|            | Sample 2 | Cystoscopy                    | Recurrence-free | 3 | - | - | - | - |
| Patient 38 | Sample 1 | TURB                          | T1G3            | 0 | - | - | - | - |
|            | Sample 2 | Clinical check-up + urography | Recurrence-free | 4 | - | - | - | - |
| Patient 39 | Sample 1 | TURB                          | T1G3            | 0 | - | - | - | - |
|            | Sample 2 | Cystoscopy                    | Recurrence-free | 3 | - | - | - | - |
| Patient 40 | Sample 1 | TURB                          | T1G3            | 0 | - | - | - | - |
|            | Sample 2 | Cystoscopy                    | Recurrence-free | 3 | - | - | - | - |
| Patient 41 | Sample 1 | TURB                          | T1G2            | 0 | - | - | - | - |
|            | Sample 2 | Cystoscopy                    | Recurrence-free | 3 | - | - | - | - |

**Table S3. Characterization of patient samples included in the study.** Detailed breakdown for each of the 41 patients encompassing their presurgery and postsurgery samples included in the study. The table outlines the procedures undertaken for all samples as well as the clinical information and time point (months) for presurgery and postsurgery sample. Individual urine and serum EV particle concentration (particles/ml) and mode size (nm) by NTA are outlined. Some size values are absent due to sample limitation.

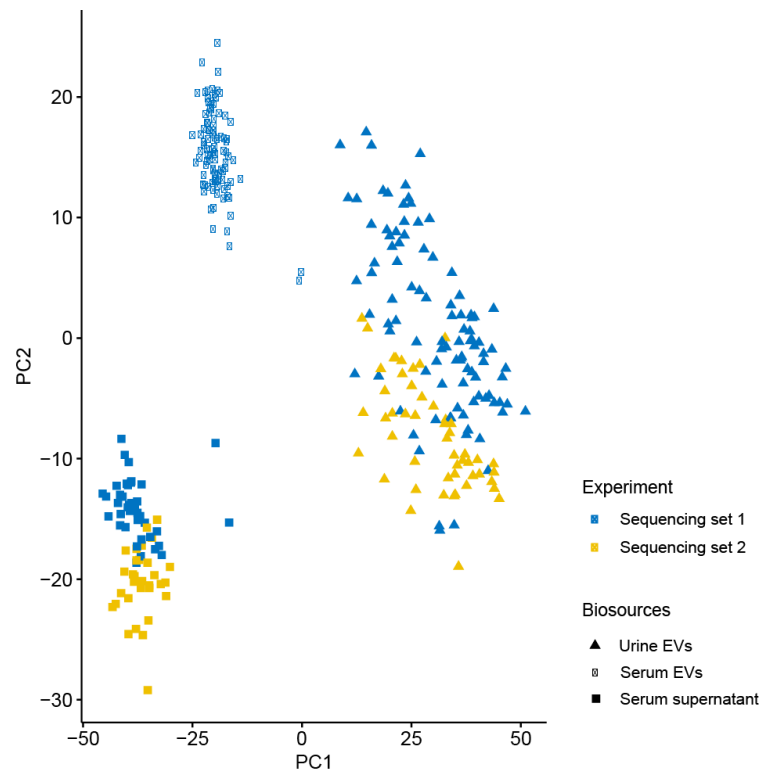

**Figure S1. Principal component analysis our three biosources in sequencing set 1 & 2.** The PCA plot depicts clear individual clustering for urine EVs, serum EVs and serum supernatant biosources representing all patient samples investigated in the both sequencing set 1 and sequencing set 2.

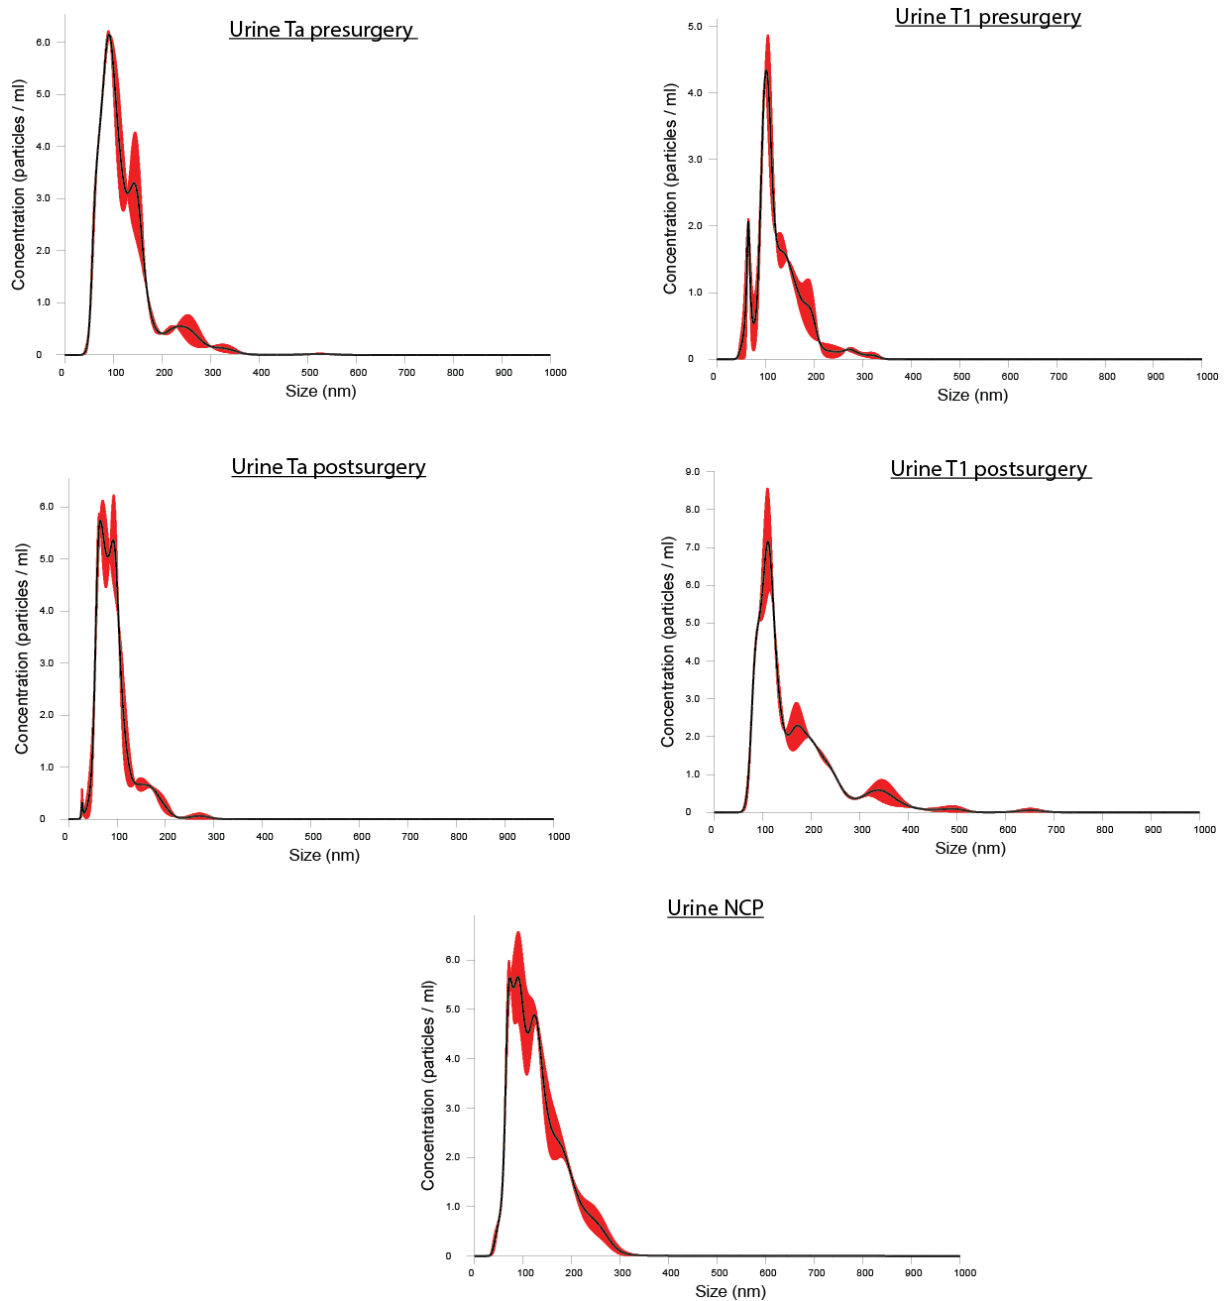

**Figure S2. Representative NTA results for urine T1, Ta (presurgery and postsurgery) and NCP samples:** NTA analysis graphs of EV samples isolated from urine depicting EV sizes representative of small EVs.



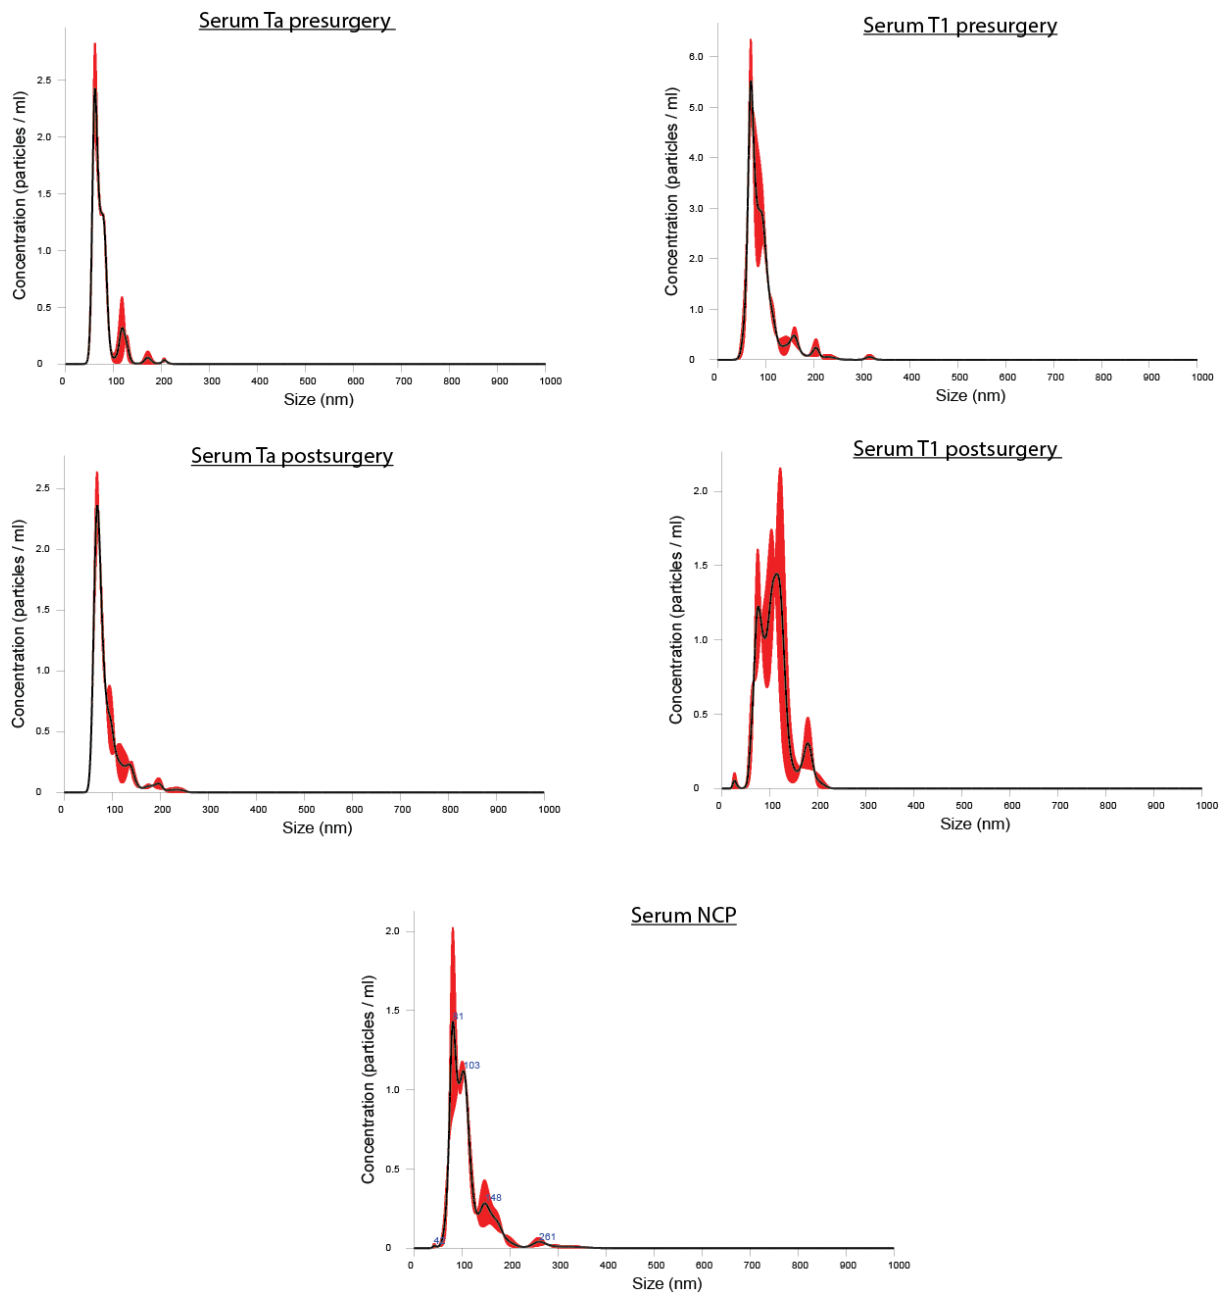

**Figure S3. Representative NTA results for serum T1, Ta (presurgery and postsurgery) and NCP samples:** NTA analysis graphs of EV samples isolated from serum depicting EV sizes representative of small-EVs.

A. Urine EVs

T1 pre vs post

|             | Adj. p-value | Log2 fold change |
|-------------|--------------|------------------|
| miR-486-5p  | 1,90E-06     | 3,68E+00         |
| miR-451a    | 3,86E-04     | 4,01E+00         |
| miR-205-5p  | 3,75E-02     | 2,11E+00         |
| miR-1246    | 3,75E-02     | 2,39E+00         |
| miR-483-3p  | 3,60E-02     | 2,35E+00         |
| miR-1323    | 3,60E-02     | 2,60E+00         |
| miR-6073-3p | 3,60E-02     | 2,24E+00         |
| miR-202-30  | 3,75E-02     | 1,75E+00         |
| miR-4508-5p | 3,75E-02     | 1,64E+00         |
| miR-483-5p  | 3,75E-02     | 2,02E+00         |
| miR-6768-5p | 3,66E-02     | 1,92E+00         |

B. Serum Supernatant

Adj. p-value

|               | T1 pre vs post | T1 pre vs NCP |
|---------------|----------------|---------------|
| miR-3158-3p   | 3,00E-07       | 1,20E-01      |
| miR-3921-3p   | 3,47E-02       | 1,56E-02      |
| miR-4654-3p   | 3,47E-02       | 1,20E-01      |
| miR-922-3p    | 4,30E-02       | 1,20E-01      |
| miR-612-3p    | 3,47E-02       | 1,70E-01      |
| miR-4453-3p   | 7,97E-03       | 9,97E-01      |
| miR-942-3p    | 7,97E-03       | 2,78E-01      |
| miR-4734-3p   | 4,30E-02       | 5,50E-01      |
| miR-185-3p    | 2,80E-02       | 5,60E-01      |
| miR-6851-3p   | 3,47E-02       | 5,14E-01      |
| miR-135a-1-3p | 4,30E-02       | 9,76E-01      |
| miR3153-3p    | 1,82E-01       | 1,71E-02      |

Log2 fold change

|               | T1 pre vs post | T1 pre vs NCP |
|---------------|----------------|---------------|
| miR-3158-3p   | 4,32E+00       | 2,72E+00      |
| miR-3921-3p   | 2,76E+00       | 3,48E+00      |
| miR-4654-3p   | 2,94E+00       | 2,87E+00      |
| miR-922-3p    | 2,63E+00       | 2,47E+00      |
| miR-612-3p    | 2,72E+00       | 2,30E+00      |
| miR-4453-3p   | 2,52E+00       | 4,54E-03      |
| miR-942-3p    | 3,25E+00       | 2,01E+00      |
| miR-4734-3p   | 2,85E+00       | 1,27E+00      |
| miR-185-3p    | 3,22E+00       | 1,24E+00      |
| miR-6851-3p   | 3,15E+00       | 1,43E+00      |
| miR-135a-1-3p | -2,65E+00      | 1,41E-01      |
| miR3153-3p    | -2,43E+00      | -3,91E+00     |

**Table S4. Adjusted p-values and log2 fold change for DEmiRNAs in urine EVs and serum supernatants.**

Adjusted p-values for all DEmiRNAs detected in (A) urine EVs T1 presurgery (pre) samples versus postsurgery (post) samples for the same patient and (B) serum supernatant T1 presurgery versus postsurgery or NCP samples as detected in Figure 2E and 2G.

Urine EVs : T1 pre vs post

Adj. P-value

|               | Seq set 1 | Replica  |
|---------------|-----------|----------|
| miR-451a      | 3,86E-04  | 3,54E-05 |
| miR-486-5p    | 1,92E-06  | 2,33E-02 |
| miR-483-5p    | 3,75E-02  | 5,40E-02 |
| miR-205-5p    | 3,75E-02  | 1,04E-01 |
| miR-183-5p    | 1,38E-01  | 6,73E-02 |
| miR-4508-5p   | 3,75E-02  | 2,16E-01 |
| miR-483-3p    | 3,60E-02  | 5,01E-01 |
| miR-126-3p    | 5,58E-01  | 2,69E-02 |
| miR-16-5p     | 4,03E-01  | 2,06E-01 |
| miR-320c-1-3p | 1,38E-01  | 5,01E-01 |

Urine EVs : T1 pre vs post

Log2 fold change

|               | Seq set 1 | Replica  |
|---------------|-----------|----------|
| miR-451a      | 4,01E+00  | 4,62E+00 |
| miR-486-5p    | 3,68E+00  | 3,03E+00 |
| miR-483-5p    | 2,02E+00  | 3,94E+00 |
| miR-205-5p    | 2,11E+00  | 2,97E+00 |
| miR-183-5p    | 9,35E-01  | 1,43E+00 |
| miR-4508-5p   | 1,64E+00  | 1,65E+00 |
| miR-483-3p    | 2,35E+00  | 1,34E+00 |
| miR-126-3p    | 1,35E+00  | 1,96E+00 |
| miR-16-5p     | 1,37E+00  | 1,27E+00 |
| miR-320c-1-3p | 1,40E+00  | 1,25E+00 |

**Table S5. Adjusted p-values and log2 fold change for top 10 DEmiRNAs in T1 patients from both runs.**

Adjusted p-values for top 10 DEmiRNAs in urine EVs T1 presurgery (pre) versus postsurgery (post) samples in the ten T1 patients in sequencing (seq) set 1 and the ten T1 replica samples (replica) in sequencing set 2 as per Figure 3C.
